# Supplementary material
Source: ML conference proceedings conference paper supplement (https://openreview.net/forum?id=UHIKtKzTj7)
Supplement: supplementary_material [file attachment]

(a)

### Process Systems

Partial Mechanism Knowledge  $\downarrow$   $\uparrow$  Hybrid Modeling  
 Sparse Labeled Data  $\downarrow$   $\uparrow$  Forward Acceleration

### Physics-Aware Proxy Model (PAPM)

#### Process Model

Conservation Relations

Constitutive Relations

Boundary Conditions

Physics-Aware

#### Temporal-Spatial Stepping Method (TSSM)

Temporal

Eular or R-K Scheme

Spatial

Structure-Preserved  
Spatial Operation

(b)

Initial conditions

$$\mathbf{U}(0; x, y) \sim a(-\Delta + bI)^{-3}$$

Coefficients

$$v \sim U[A, B]$$

Multiple Inputs

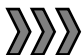

Train

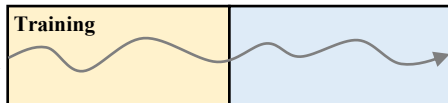

Test

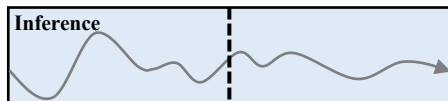

0

$T'$

$T_{end}$

T

(c)

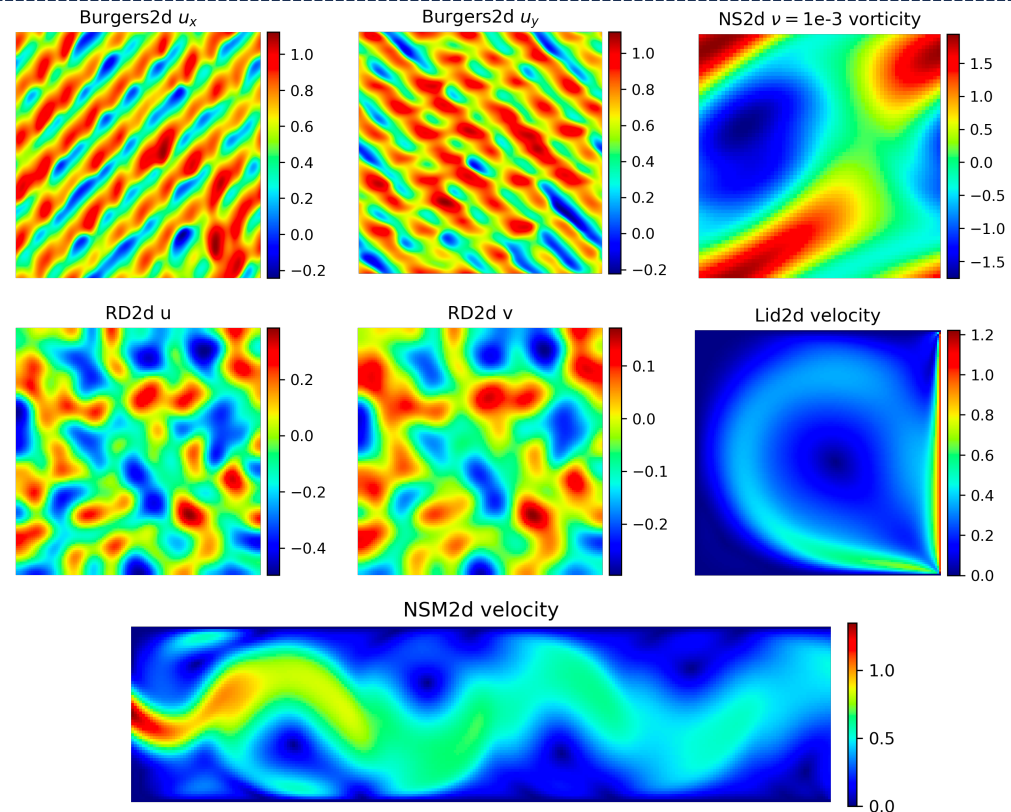

Multiple Non-trivial Benchmark Process Systems Datasets
